# Epigenomic plasticity of *Arabidopsis msh1* mutants under prolonged cold stress

**Sunil Kumar Kenchanmane Raju<sup>1</sup>, Mon-Ray Shao<sup>1</sup>, Yashitola Wamboldt and Sally Mackenzie<sup>2,3</sup>**

Department of Agronomy and Horticulture, University of Nebraska-Lincoln, Lincoln, Nebraska, USA 68588

<sup>2</sup> Current address: Departments of Biology and Plant Science, Pennsylvania State University, University Park, PA 16802

<sup>3</sup>Corresponding author: sam795@psu.edu

362 Frear North Bldg  
Pennsylvania State University  
University Park, PA 16802  
Ph 814-863-8324

<sup>1</sup> Both authors contributed equally to the work

## 1 ABSTRACT

2 Dynamic transcriptional and epigenetic changes enable rapid adaptive benefit to  
3 environmental fluctuations. However, the underlying mechanisms and the extent to which this  
4 occurs are not well known. *MutS Homolog 1 (MSH1)* mutants cause heritable developmental  
5 phenotypes accompanied by modulation of defense, phytohormone, stress-response and  
6 circadian rhythm genes, as well as heritable changes in DNA methylation patterns. Consistent  
7 with gene expression changes, *msh1* mutants display enhanced tolerance for abiotic stress  
8 including drought and salt stress, while showing increased susceptibility to freezing temperatures  
9 and bacterial pathogen *P syringae*. Our results suggest that chronic cold and low light stress (10  
10 °C, 150 μE) influences non-CG methylation to a greater degree in *msh1* mutants compared to  
11 wild type Col-0. Furthermore, CHG changes are more closely pericentromeric, whereas CHH  
12 changes are generally more dispersed. This increased variation in non-CG methylation pattern  
13 does not significantly affect the *msh1*-derived enhanced growth behavior after mutants are  
14 crossed with isogenic wild type, reiterating the importance of CG methylation changes in *msh1*-  
15 derived enhanced vigor. These results indicate that *msh1* methylome is hyper-responsive to  
16 environmental stress in a manner distinct from the wild type response, but CG methylation  
17 changes are potentially responsible for growth vigor changes in the crossed progeny.

## 18 INTRODUCTION

19 Plants have developed mechanisms to overcome constantly changing environments.  
20 Species that are more adaptable to changing environments through phenotypic plasticity and  
21 selection of adaptable traits survive. These changes occur at different levels, from morphological  
22 and physiological changes to modulations in gene expression and chromatin behavior, allowing  
23 plants to cope with the challenges of nature. While a major source of this adaptive response can  
24 be attributed to genetic variation (Franks and Hoffmann, 2012), recent studies are pointing  
25 towards the potential role of chromatin modifications and epigenetics in plant responses to  
26 environmental changes (Bilichak and Kovalchuk, 2016). Environment-induced epigenetic  
27 modifications are generally transient, and the consistency of the environmental cue perceived by  
28 plants plays a role in inducing epigenetic changes and their inheritance (Uller et al., 2015).

29 Cytosine DNA methylation is a heritable epigenetic modification involving the addition  
30 of a methyl (-CH<sub>3</sub>) group to the fifth carbon of the pyrimidine ring of cytosine nucleotides. This  
31 addition is catalyzed by DNA methyltransferases, commonly found in most eukaryotes (Cheng,  
32 1995). In plants, DNA methylation can occur in three sequence contexts: the symmetric CG and  
33 CHG contexts, and the asymmetric CHH context, where H represents A, C, or T nucleotides  
34 (Law and Jacobsen, 2010). Methylation in these different contexts displays distinct genomic  
35 patterning within genes, repeat regions, and transposable elements. While CG methylation is  
36 largely concentrated within genes and transposable elements, CHG and CHH methylation  
37 contexts are usually associated with repeat regions and transposable elements (Cokus et al.,  
38 2008).

39 One role of DNA methylation is to silence transposable elements, which can become  
40 activated during stress conditions (Slotkin and Martienssen, 2007). In some cases, changes in  
41 DNA methylation have also been associated with stress-induced gene regulation, such as during

42 phosphate starvation or *Pseudomonas syringae* infection (Downen et al., 2012; Yong-Villalobos  
43 et al., 2015), and may provide the mechanistic basis for memory (Downen et al., 2012; Kinoshita  
44 and Seki, 2014). Despite major progress in dissecting the genetic pathways responsible for  
45 establishment and maintenance of context-specific DNA methylation patterns (Stroud et al.,  
46 2013), functions of DNA methylation, particularly genic CG methylation, has remained  
47 mysterious (Zilberman, 2017).

48 *MutS Homolog 1 (MSH1)* is a plant-specific, nuclear-encoded gene that targets its  
49 protein to both plastids and mitochondria. Arabidopsis *msh1* mutants display a range of altered  
50 phenotypes that include variegation, dwarfing, delayed maturity transition, delayed flowering,  
51 and partial male sterility (Xu et al., 2011). The *msh1* mutants display higher tolerance to heat,  
52 high light, and drought stress (Shedge et al., 2010; Viridi et al., 2016; Xu et al., 2011),  
53 particularly in individuals showing stronger developmental phenotypes. *MSH1* phenotypes are  
54 conserved between monocots and eudicots. This conservation is evidenced in the RNAi  
55 suppression phenotypes, and the consistent observation that subsequent *MSH1*-RNAi transgene  
56 segregation gives rise to transgenerational *msh1* memory in sorghum, pearl millet, tomato,  
57 tobacco and soybean (de la Rosa Santamaria et al., 2014; Raju et al., 2017; Xu et al., 2011; Xu et  
58 al., 2012; Yang et al., 2015).

59 Disruption of *MSH1* causes genome-wide methylome repatterning in both CG and non-  
60 CG context (Viridi et al., 2015), along with large-scale changes in gene expression related to  
61 abiotic and biotic stress response, phytohormone pathways, circadian rhythm, defense response  
62 and signaling (Shao et al., 2017). Arabidopsis *msh1* memory lines show a subset (ca 10%) of the  
63 gene expression changes of the T-DNA insertion mutant, with enrichment in circadian rhythm,  
64 ABA signaling, and light-response pathways, and with methylome repatterning predominantly in  
65 CG context (Sanchez et al., 2018).

66 In this study, we investigated the stress response behavior of plants following *msh1*  
67 developmental reprogramming. We show that *msh1* mutants display a differential response to  
68 abiotic and biotic stress, which could be partly explained by transcriptome changes. Epi-lines,  
69 deriving from crosses of *msh1* with wild type, showed increased seed yield and higher tolerance  
70 to salt, freezing and mild heat stress. Under prolonged cold stress, *msh1* mutants showed  
71 increased variation in DNA methylation, particularly in non-CG context, and this increased CHG  
72 and CHH methylation pattern variation did not appear to influence the *msh1* crossing-derived  
73 vigor phenotype. Taken together, the data imply that developmental phenotypes in  
74 the *msh1* mutants are caused by large-scale gene expression changes associated with stress  
75 response, along with genome-wide methylome repatterning. Methylome changes in non-CG  
76 context were disproportionately affected by cold stress and were hyper-responsive to  
77 environmental changes, whereas changes in CG context appeared to be stable and to influence  
78 plant phenotype.

## 79 MATERIALS AND METHODS

### 80 Plant growth conditions and PCR genotyping

81 The genetic background used throughout the study was Arabidopsis Col-0 ecotype. For  
82 phenotypic measurements, seeds were sown into plastic pots containing Fafard germination mix  
83 with Turface MVP added. After 48-72 hrs of cold stratification at 4 °C in a dark chamber, pots

84 were moved to growth chambers set at 22 °C. The *msh1* T-DNA mutant was obtained from  
85 Arabidopsis Biological Resource Center (SAIL\_877\_F01, stock number CS877617) and  
86 genotyped as described previously (Shao et al., 2017). Epi-lines were developed by crossing wild  
87 type with *msh1* mutants, some of which had been exposed to cold stress (S), and subsequently  
88 self-pollinating filial generations. PCR genotyping as previously described (Shao et al., 2017),  
89 was performed on the F<sub>2</sub> population and only plants with wild type *MSH1/MSH1* were evaluated  
90 and forwarded. Yield and stress tests were performed on bulked epi-F<sub>3</sub> populations.

## 91 **Abiotic and biotic stress treatments**

92 All stress treatments were performed on wild type Col-0, *msh1* mutants #9, #12-4 and  
93 #12-29, epiF<sub>3</sub> populations derived from crosses WT x *msh1*-N, WT x *msh1*-VD, WT x *msh1*-  
94 N(S), and WT x *msh1*-VD(S) that involved the two phenotypic classes of *msh1* mutants, normal  
95 phenotype (N) and variegated dwarf (VD), with and without exposure to stress (S).

96 Seeds for stress treatments were bleach-sterilized and sown on half-strength MS medium  
97 containing 1.5% sucrose and 0.5% MES, pH 5.7, solidified with 4% agar in sterile plastic Petri-  
98 plates. For 200mM salt germination tests, 11.7 g of NaCl was added to the growth media before  
99 sterilization. After 48-72 hrs of cold stratification in a dark room at 4 °C, plates were moved to  
100 Percival growth chambers set at 22 °C and 16/8 light/dark cycle. Germination was scored based  
101 on root length of more than 3mm at two weeks after plates were moved to the growth chamber.

102 For freezing tolerance, two-week-old seedlings were cold acclimatized for one week at 4  
103 °C in 12/12 hrs light/dark photoperiod. Freezing tests were performed as previously described  
104 (Barnes et al., 2016), with necessary modifications. Specifically, post-freezing plates were placed  
105 in a 4 °C dark chamber for 24 hrs before recovery in control growth conditions for 5-7 days.  
106 Survival was scored as plants having fully expanded green rosette leaf after recovery. The *sfr2-3*  
107 mutant (Moellering et al., 2010), used as negative control, was a kind gift from Dr. Rebecca  
108 Roston.

109 Two independent *MSH1* epi-lines for each phenotypic class of *msh1* mutant were  
110 developed, WT x *msh1*-N1 and WT x *msh1*-N2, created by crossing two independent *msh1*  
111 mutants with a normal phenotype (N1, N2), and WT x *msh1*-VD1 and WT x *msh1*-VD2  
112 developed from two *msh1* mutants with a variegated dwarf phenotype (VD1, VD2). Seed yield  
113 was measured as total seed weight at maturity. Floral stems of six-week-old plants were tied to a  
114 wooden stake and the plant enclosed completely using Arabisifter (Lehle Seeds, SNS-03),  
115 making a pouch-like structure in the bottom to collect shattered seeds. All four epi-F<sub>3</sub>s and wild  
116 type were grown in a completely randomized design in a growth chamber at 22 °C or 32 °C, 16/8  
117 hr light/dark cycle. Seeds were carefully harvested from each population (n>18 plants) at  
118 maturity. Seeds were dried in a 37 °C chamber for 48-72 hrs before recording seed weights.

119 *Pseudomonas syringae* pv. *tomato* DC3000 strains were grown for 24 hr at 30 °C on  
120 King's B media (King et al., 1954) with the appropriate antibiotics, and resuspended to an  
121 OD<sub>600</sub> of 0.2 ( $2 \times 10^8$  cells ml<sup>-1</sup>) in 10 mM MgCl<sub>2</sub>. The resuspended culture was sprayed  
122 uniformly on upper and lower surfaces of fully expanded leaves of 4-week-old wild type, *msh1*  
123 mutant, and *msh1*-derived epi-lines using a jet-spray bottle. Treated plants were well-watered  
124 and kept in a dark room for five days, followed by five to seven days in a growth chamber at 22  
125 °C and 16/8 hr light/dark cycle before scoring for survival.

## 126 RNA extraction and sequencing analysis

127 Four-week-old plants grown in 22 °C were transferred to a growth chamber set at 10 °C,  
128 150  $\mu\text{E m}^{-2} \text{s}^{-1}$ , for 30 days. Tissue from four fully expanded rosette leaves was sampled before  
129 and after 10 °C transfer with three replicates per group. For each sample, frozen tissue was  
130 ground and total RNA extracted using a standard TRIzol reagent protocol. RNA samples were  
131 then treated with DNaseI (Qiagen catalog #79254). Qiagen RNeasy Plant Mini Kit (Qiagen  
132 catalog #74904) was used to purify total RNA samples prior to RNA sequencing (RNAseq).  
133 Poly(A)-enriched RNAseq was performed by Beijing Genomics Institute (BGI), generating at  
134 least 59.6 M paired-end, 100-bp reads per sample. Reads were trimmed and aligned to the  
135 Arabidopsis TAIR10 reference genome sequence with annotation from Araport11 PreRelease3  
136 using TopHat2 (Kim et al., 2013). The DESeq2 method (Love et al., 2014) was used to identify  
137 differentially expressed genes (cutoff of FDR < 0.05,  $|\log_2(\text{fold change})| \geq 1$ , and mean FPKM  $\geq 1$ ).  
138 Gene Ontology (GO) enrichment analysis was performed using the DAVID database (Huang et al.,  
139 2009). GO terms with p-value < 0.05 after Benjamini-Hochberg (Benjamini and Hochberg, 1995)  
140 correction for multiple testing were considered statistically significant in each comparison.

141 For transposable element (TE) family expression analysis, reads were aligned using the  
142 STAR 2-pass method (Dobin et al., 2013), allowing up to 100 multi-mapped locations as per the  
143 recommendation of Tetrascripts (Jin et al., 2015). Quantification and testing for differential  
144 expression of TEs were performed using Tetrascripts with the developer-provided Arabidopsis  
145 TE family annotation.

## 146 Cold stress methylome analysis

147 To obtain whole-genome bisulfite sequencing data for the cold stress experiment, plants  
148 were grown in a controlled growth chamber set to 10 °C, 150  $\mu\text{E m}^{-2} \text{s}^{-1}$  or 500  $\mu\text{E m}^{-2} \text{s}^{-1}$  and  
149 12/12 day/night photoperiod for 21 days, beginning from germination, then moved to recovery at  
150 22 °C, 250  $\mu\text{E m}^{-2} \text{s}^{-1}$  for 18 days before sampling. Control plants were grown continuously at  
151 22 °C, 250  $\mu\text{E m}^{-2} \text{s}^{-1}$  from sowing, and sampled upon reaching a similar developmental stage as  
152 cold-stress recovered plants. Four fully-expanded rosette leaves from each individual plant were  
153 harvested and DNA extracted as previously described (Li and Chory, 1998), with two replicates  
154 per group. Library generation and bisulfite-sequencing were performed by BGI on a Hiseq2000.  
155 Reads were aligned to the TAIR10 reference genome using Bismark (Krueger and Andrews,  
156 2011) with default mismatch parameters. Due to the potential for artifacts, cytosines of CCC  
157 context were excluded from CHH analysis.

158 The R package *methylKit* 1.1.8 (Akalin et al., 2012) was used to call DMRs, based on  
159 100 bp non-overlapping windows, separately for CG, CHG and CHH contexts. Only cytosine  
160 base positions with  $\geq 3$  reads were retained for analysis, and normalized methylation counts for  
161 each cytosine were used based on coverage. Windows with  $\geq 5$  cytosines (of the given context)  
162 were considered for analysis, to rule out low information regions. The principal component  
163 analysis was performed using the *PCASamples* function. Subsequent comparison between  
164 treatment (cold or control) and genotype (*msh1* T-DNA or wild type) combinations were  
165 performed by logistic regression with *methylKit*. DMRs for each context were identified based  
166 on a methylation difference of at least 10% absolute value and a q-value < 0.05, then clustered  
167 using Ward's method (Ward Jr, 1963). For CG context, genes overlapping DMRs within each  
168 cluster were identified and subjected to GO enrichment analysis using the DAVID database

169 (Huang et al., 2009). For CHG and CHH contexts, TE's overlapping DMRs within each cluster  
170 were identified and tested for enrichment of TE families and superfamilies (annotated by  
171 TAIR10) using the hypergeometric test (FDR < 0.01).

172

## 173 RESULTS:

### 174 The *msh1* mutant shows variable abiotic and biotic stress tolerance

175 Previous studies have shown that *msh1* mutants are more tolerant to drought, high light,  
176 and heat stress (Shedge et al., 2010; Viridi et al., 2016; Xu et al., 2011). We tested for other  
177 abiotic stress effects, focusing first on salt and freezing temperature. Seeds of *msh1* mutant and  
178 wild type were grown on plates with half-strength MS media and 200 mM NaCl. The 200 mM  
179 NaCl concentration is highly selective for germination tests in Col-0 (Wibowo et al., 2016).  
180 Germination was scored based on root length of greater than 3mm at two weeks after sowing,  
181 assessed in three independent experiments. Only 32% percent of wild type seeds germinated on  
182 200mM NaCl plates. Two *msh1* mutants, #9 and #12-29, showed significantly higher  
183 germination than wild type (p-value 1.25e-10 and 0.000128 respectively), while *msh1*#12-4 did  
184 not show significant difference (p-value 0.147672). These results suggest higher salinity  
185 tolerance in *msh1* mutants, with variation in mutant sub-populations (Fig 1A). This result is  
186 consistent with gene expression data from *msh1* mutants (Shao et al., 2017), which show  
187 differential expression for 493 (Dataset S1) of the 1667 salt stress-responsive genes identified  
188 through comparative microarrays (Sham et al., 2015).

189 To examine whether or not *msh1* mutants also showed tolerance to freezing temperatures,  
190 two-week-old seedlings of wild type and *msh1* T-DNA mutants were cold acclimatized for a  
191 week before exposure to -2 °C for 4 hrs, followed by nucleation and -10 °C for 12 hrs. Survival  
192 was scored as the presence of green rosette leaves one week after recovery under normal growth  
193 conditions (22°C, 16/8 light/dark cycle). Surprisingly, the survival rate of *msh1* mutants was  
194 lower than that of wild type (Fig 1B), indicating that the mutants are not tolerant to all stresses.  
195 Under our experimental conditions, 34.5% wild type survived -10 °C. The *msh1* mutants #9 and  
196 #12-29 showed significantly higher susceptibility to freezing temperatures (p-value 0.00222 and  
197 0.00881 respectively), while *msh1* mutant #12-4 was not significantly different from wild type (p-  
198 value 0.42651). From a set of 590 differentially expressed genes correlated with acclimated and  
199 non-acclimated freezing tolerance (Hannah et al., 2006), only 64 were altered in expression in  
200 the *msh1* variegated dwarf mutant (Dataset S2).

201 Because *msh1* mutants have increased tolerance to abiotic stresses like drought, heat,  
202 high light, and salt, we tested whether or not they were likewise more resistant to biotic stress.  
203 We challenged *msh1* mutants with the gram-negative bacterial pathogen *Pseudomonas*  
204 *syringae* pv. *tomato* DC3000, which causes bacterial speck disease in tomato and is pathogenic  
205 to Arabidopsis. The *msh1* mutants showed susceptibility to the bacterial pathogen. While 87.5%  
206 of wild type plants survived the stress, *msh1* mutant sub-populations #12-29 and #12-4 showed  
207 significantly higher susceptibility (Fig S1A: p-value 0.00633 and 0.08136 respectively). Within  
208 one population, *msh1* #9, plants with variegation and dwarfing showed significantly higher  
209 susceptibility (p-value 4.35e-05 and 7.15e-07 respectively) to *P. syringae* than *msh1* mutants  
210 with a mild phenotype (Fig S1B: p-value 0.327). Thus, *msh1* mutants are susceptible to biotic

211 stress despite markedly increased expression of biotic stress-responsive pathways in *msh1*  
212 mutants (Shao et al., 2017), and the biotic stress response appears related to the severity of the  
213 *msh1* phenotype.

214 The *msh1* mutant and derived *msh1* memory lines are considered to represent two distinct  
215 epigenetic states of *msh1* effect, differing in phenotype, methylome and gene expression profiles  
216 (Sanchez et al., 2018), with a third state emerging from crosses of the *msh1* mutant (or memory  
217 line) to wild type. This third state is characterized by markedly enhanced growth vigor (Virdi et  
218 al. 2015). To investigate the inheritance of these stress responses following *msh1* crossing, seed  
219 germination rate in 200mM NaCl concentration and survival of seedlings at -10 °C freezing  
220 temperatures were assayed in three independent experiments for *msh1*-derived epi-lines in the F<sub>3</sub>  
221 generation, with wild type as a control. Epi-lines were created by crossing wild type Col-0 with  
222 *msh1* mutants as pollen donor, and self-pollinating filial generations to obtain epi-F<sub>3</sub> bulks (see  
223 methods). When seeds were germinated on plates with 200mM NaCl, WT x *msh1*-N and WT x  
224 *msh1*-VD showed significantly higher germination rate (p-value 7.15e-14 and 3.20e-12  
225 respectively) than wild type (Fig S2A). This result was consistent with the parental *msh1* mutant,  
226 which showed a similar increase in salt tolerance (Fig 1A). However, epiF<sub>3</sub> population WT x  
227 *msh1*-VD also showed higher tolerance to freezing (Fig S2B: p-value 0.014546), where *msh1*  
228 mutant showed greater susceptibility. These observations are consistent with the expectation that  
229 *msh1* x wild type crosses produce a different epigenetic state, thus resulting in distinctive  
230 phenotypes. Crossing the *msh1* mutant may alter circadian clock regulation of freezing stress  
231 response.

232 To evaluate the response of progeny from crossing under less severe, non-lethal stress,  
233 we subjected epi-F<sub>3</sub> plants to mild heat stress and measured total seed weight at harvest. For this  
234 experiment, four epi-lines and wild type were grown in growth chambers under control (22 °C)  
235 or mild heat stress (32 °C) throughout the plant life cycle. Epi-lines showed 9.7% to 19.6 %  
236 increase in seed yield compared to wild type in control conditions (Fig 2A). Three of the epi-  
237 lines also performed significantly better than wild type under mild heat stress, showing 9.5% to  
238 16.5% increase in yield (Fig 2A). The lower yield penalty under mild heat stress in the three epi-  
239 lines, coupled with the enhanced salt and cold tolerance, provides an indicator of greater yield  
240 stability and lower environmental effects on the *MSH1* growth-enhanced phenotype (Fig 2B).  
241 These results resemble the higher yield stability observed in soybean *MSH1* epi-lines grown  
242 across four different locations in Nebraska (Raju et al., 2017).

### 243 **The methylome of *msh1* is hyper-responsive to cold stress with disproportionately higher** 244 **CHH hypomethylation**

245 Transcriptome studies of *msh1* showed clear enrichment of biotic and abiotic stress  
246 response genes, including response to cold. Despite changes in cold-responsive transcription  
247 factors (Shao et al., 2017), *msh1* mutants showed susceptibility to freezing temperatures. These  
248 observations led us to test whether *msh1* mutants would show differential methylome and  
249 transcriptome response to low-temperature stress.

250 To evaluate the extent of DNA methylation changes related to long-term cold stress,  
251 *msh1* mutants and wild type plants were grown at 10 °C for 18 days under 12/12 light/dark cycle,  
252 then allowed to recover at 22 °C for 18 days before sampling for DNA extraction. Plants were  
253 allowed to recover prior to sampling for two reasons: Plant growth was slower under cold stress,

254 complicating the collection of sufficient tissue for methylome sequencing. In addition, we  
255 wanted to avoid transient methylation changes present during plant exposure to cold treatment.

256 To facilitate comparison of each region between different genotype and treatment  
257 combinations, methylome analysis was performed using fixed 100-bp non-overlapping windows.  
258 Principal component analysis plots from the first two principal components using the upper 0.9  
259 quantile of variable windows showed CG methylation separating by genotype between wild type  
260 and *msh1* mutants, with or without stress (Fig 3A). These observations are consistent with studies  
261 of the *msh1* memory lines, where CG methylation is predominant in association with a memory  
262 phenotype (Sanchez et al., 2018). CHG methylation showed a similar pattern, although cold-  
263 stressed samples were discriminated from control samples in *msh1* mutants more than in wild  
264 type (Fig 3A). Notably, CHH methylation showed the greatest degree of discrimination for the  
265 cold stress treatment, predominantly in *msh1* mutants (Fig 3A). Together, these results indicate  
266 that cold stress influences DNA methylation in all methylation contexts, but there is evidence of  
267 interaction with the *msh1* background, amplifying the effect in CHH context.

### 268 **Genome-wide distribution of DMRs in wild type and *msh1* mutants in response to cold** 269 **stress**

270 We investigated the number and genomic distribution of differentially methylated regions  
271 (DMRs). DMR calling was based on logistic regression over 100 bp non-overlapping window,  
272 using a threshold of more than 10% absolute change in methylation level in each cytosine  
273 context. The resulting number of DMRs (Table 1, Fig 3B) confirmed trends observed by  
274 principal component analysis (Fig 3A). As expected, CG-DMRs mostly occurred over genes and  
275 were relatively few between cold and control treatments in wild type or *msh1* while comparing  
276 any *msh1* group to wild type (Fig S3A). We found 11,579 CG-DMRs, 399 CHG-DMRs, and  
277 2332 CHH-DMRs when comparing *msh1* to wild type under control conditions. Almost equal  
278 numbers of DMRs were hyper or hypomethylated in symmetric methylation context, while in  
279 CHH context there were 30% more hypomethylated DMRs in *msh1* (Table 1, Fig 3B). We also  
280 detected 2592 CG-DMRs, 109 CHG-DMRs and 2658 CHH-DMRs induced by cold stress alone  
281 in the wild type. The magnitude of CG changes in the *msh1* mutant was 4.35 times higher than  
282 CG changes induced by cold stress in wild type, while the magnitude of CHH changes was not  
283 significantly different. This implies that cold stress predominantly affects CHH methylation,  
284 more than CG and CHG methylation, consistent with previous reports of methylome behavior  
285 under low temperature (Dubin et al., 2015).

286 We examined whether *msh1* background affects methylation changes upon cold stress.  
287 We found 2626 CG-DMRs, 321 CHG-DMRs and 5539 CHH-DMRs between stressed and  
288 unstressed *msh1* mutant (Table 1, Fig 3B). Thus, CHH methylation, primarily over transposable  
289 elements (Fig S3A), showed the greatest effect of cold treatment within the *msh1* background,  
290 consistent with separation seen in the PCA plot (Fig 3A). Although CHH methylation is affected  
291 by cold stress in wild type, CHH DMRs in cold-stressed *msh1* are twice as abundant as in similar  
292 wild type comparisons. Whereas CG DMR patterns were nearly identical for cold-stressed and  
293 control *msh1* mutants when compared to wild type, CHG and CHH DMRs showed a clear  
294 distinction in patterns, with several loci switching between hyper and hypomethylation (Fig 3C-  
295 E). These results indicate an interaction between the *msh1* effect and cold stress, such that non-  
296 CG methylation patterns are disproportionately affected.



## 297 **Non-CG methylome changes in association with transposable elements**

298 To investigate the genomic distribution of non-CG changes in response to stress, we  
299 clustered non-CG DMRs and looked for enrichment of TE superfamilies in these clusters. Both  
300 CHG- and CHH-DMRs formed 4 clusters each (Dataset S3). While all four clusters in CHG-  
301 DMRs showed enrichment for DNA/En-spm, LTR/COPIA, and LTR/Gypsy elements, clusters  
302 three (hyper) and one (hypo), which showed similar trends in all comparisons, were also  
303 enriched in LINE/L1 elements. In CHH-DMR clusters, DNA/MuDR elements were enriched in  
304 all clusters. Cluster one, which contained the most DMRs and hypomethylation in all three  
305 comparisons (wild type-stressed vs wild type, *msh1* vs wild type, and *msh1*-stressed vs wild  
306 type) showed enrichment for LINE/L1, LTR/COPIA, and LTR/Gypsy elements. Clusters three  
307 and four, which showed hypermethylation in *msh1*-stressed versus wild type, showed over-  
308 representation of DNA/Mariner and RC/Helitron elements.

309 Genomic distribution of DMRs matched with known behaviors within each cytosine  
310 context. CG-DMRs between *msh1* mutants and wild type were distributed evenly across the  
311 chromosome (Fig S4B, C, E), while CG DMRs from cold stress were primarily limited to  
312 heterochromatin (Fig S4A, D). CHG-DMRs and CHH-DMRs were mainly in heterochromatic  
313 regions for both comparisons. This finding is consistent with previous reports of cold stress  
314 methylome changes showing heterochromatin bias (Dubin et al., 2015). We examined expression  
315 changes in genes related to DNA methylation machinery. Interestingly, CHROMO  
316 METHYLTRANSFERASE 3 (CMT3) and DECREASE IN DNA METHYLATION 1 (DDM1)  
317 expression were down-regulated in cold-stressed *msh1* mutants compared to unstressed mutants  
318 and wild type (Fig S5). Since *cmt3* and *ddm1* mutants are known to increase heterochromatic TE  
319 de-repression, these observations appear consistent with CHH hypomethylation of  
320 heterochromatin in the interaction of *msh1* effect and low-temperature stress.

## 321 **Transcriptome response of Arabidopsis *msh1* mutants under chronic cold stress**

322 We evaluated the effect of cold stress on the transcriptome of *msh1* mutants. Wild type  
323 Col-0 and *msh1* plants were grown at 22 °C for four weeks before leaf tissue was collected  
324 (control group), or grown at 10 °C for an additional 30 days before sampling tissues for RNA  
325 extraction (cold-stressed group). Transcriptome analysis showed cold stress to be the largest  
326 contributor to transcriptional changes within the experimental groups, evident from the groups  
327 formed in PCA plotting with normalized log values of gene expression (Fig 4A). Although the  
328 magnitude of gene expression change was lower than transcriptome change in our earlier report  
329 (Shao et al., 2017), similar pathways were modulated in both *msh1* mutants with or without  
330 severe phenotype, including defense, jasmonic acid, abiotic stress response, photosynthesis and  
331 oxidative stress (Dataset S6). Technical differences, like differential developmental staging and  
332 changes in circadian phase (Hsu and Harmer, 2012), might explain the differences in the  
333 magnitude of transcriptome changes. Pathways affected in *msh1* appear to be induced by cold  
334 alone in wild type, suggesting that *msh1* mutants have stress response pathways activated in the  
335 absence of any environmental cues. Response to abiotic stress (cold, salt, light, and wounding)  
336 and biotic stress (response to chitin and jasmonic acid) are activated as a cold stress response in  
337 wild type and are also activated in *msh1* (Fig S6A). Defense response, jasmonic acid-mediated  
338 signaling, and photosynthesis-related genes were specifically enriched in *msh1* (Fig S6A: Dataset  
339 S6). Taken together, these results suggest that unlike methylome, transcriptome changes do not  
340 show increased plasticity in *msh1* mutants under cold stress.

341 We also looked into differences in transposable element expression using TEtranscripts  
342 (Jin, et al. 2015). Mariner, ATREP19, and SINE TE superfamilies were significantly down-  
343 regulated in *msh1* mutants compared to wild type, while Rath elements were up-regulated in all  
344 comparisons (Fig 4B). In contrast, SINE elements showed clear cold-stress induced up-  
345 regulation. Similarly, Helitron, Harbinger, HAT, and SADHU elements were up-regulated in  
346 wild type under cold stress (Fig 4B). At the family level, ATCOPIA28 and ATCOPIA31A  
347 showed clear stress-induced up-regulation, while VANDAL5A, ATREP3, ATCOPIA44,  
348 ATCOPIA 78, ATCOPIA 93, and ATMU1 showed down-regulation in *msh1* mutants (Fig S6B).

### 349 ***MSH1*-induced CG methylation changes are associated with enhanced growth in progeny** 350 **from *msh1* crossing**

351 To evaluate the extent to which non-CG methylome divergences affect the *msh1*  
352 crossing-derived enhanced growth phenotype in Arabidopsis (Viridi et al., 2015), we investigated  
353 the epi-lines from *msh1* mutants with or without cold stress (see methods). We assayed rosette  
354 diameter, days to flowering, and total seed weight from F<sub>2</sub> and selected F<sub>2:3</sub> lines under control  
355 growth conditions. The F<sub>2</sub> population WT x *msh1*-N(S) showed higher mean rosette diameter  
356 compared to wild type, measured at six weeks after sowing (Wilcox test, padj 0.004, Fig 5A).  
357 This population flowered an average of two days earlier (Wilcox test, padj 0.002, Fig S7). Both  
358 WT x WT(S) and WT x *msh1*-N populations showed smaller rosette diameter compared to wild  
359 type (Fig 5A). Mean seed yield, measured in milligrams, for WT x *msh1*-VD(S) and WT x *msh1*-  
360 VD was significantly higher than wild type Col-0 (Wilcox test, padj 0.015, Fig 5B), whereas no  
361 significant difference was found between WT x *msh1*-VD(S) and WT x *msh1*-VD (t-test, p-value  
362 0.80). These results show that for epiF<sub>2</sub>s, WT x *msh1*-VD(S) and WT x *msh1*-VD showed 20%  
363 and 17.9% increase in yield compared to wild type, but stressing the *msh1* mutant prior to  
364 crossing does not have a significant effect on yield. We also noticed that while WT x *msh1*-VD  
365 and WT x *msh1*-VD(S) showed increases in seed yield, WT x *msh1*-N(S) showed higher rosette  
366 diameter compared to wild type, suggesting the possibility of selection for separate traits of  
367 vegetative biomass heterosis and seed yield heterosis in *msh1* derived epi-lines.

368 We evaluated total seed weight for F<sub>2:3</sub> lines following selection of the upper 20% for  
369 seed weight in each F<sub>2</sub> population under control conditions. Although the selection was  
370 performed on seed weight, F<sub>2:3</sub> epi-lines 3C2, derived from WT x *msh1*-VD(S), and 4C2, derived  
371 from WT x *msh1*-VD, showed significantly higher rosette diameter (Wilcox test, padj = 0.018,  
372 Fig 6A) compared to wild type. Both epi-lines also showed significantly higher seed weight  
373 compared to average wild type (t-test, p-value = 0.0008 and 0.043 respectively, Fig 6B),  
374 reflecting a response to selection. Similar to F<sub>2</sub> results, there was no significant difference in seed  
375 weight between 3C2 and 4C2 (t-test, p-value = 0.203), confirming that stress treatment of *msh1*  
376 mutants does not have an effect on *msh1*-derived growth enhancement in progeny from crosses.

377 We subsequently tested whether or not observed methylome changes had an effect on  
378 stress adaptation of derived epi-lines. Surprisingly, epi-lines derived from the cold-stressed *msh1*  
379 mutant as parent showed a different response to salt and freezing stress. Whereas WT x *msh1*-  
380 VD(S) and WT x *msh1*-N(S) epi-F<sub>3</sub> populations were significantly more tolerant to salt stress (p-  
381 value 0.000914 and 0.001803 respectively), although lesser in magnitude to comparable  
382 populations from unstressed (Fig 7A), they were not significantly different from wild type in  
383 their response to freezing stress (p-value 0.867143 and 0.903767 respectively, Fig 7B). These  
384 results suggest that an interaction exists between *msh1* effect and cold stress effects. Taken

385 together, data indicate that stressing *msh1* mutants triggers a disproportionate increase in non-CG  
386 methylation, but these changes do not affect *msh1*-derived growth vigor, and can negatively  
387 affect stress adaptation in *msh1*-derived epi-lines.

## 388 DISCUSSION

389 Previous studies have shown *msh1* mutants to be more tolerant to high light, drought and  
390 heat stress (Shedge et al., 2010; Viridi et al., 2016; Xu et al., 2011), consistent with enrichment  
391 for abiotic stress response genes (Shao et al., 2017). While we saw increased tolerance for salt  
392 stress, *msh1* mutants showed lower survival rate at freezing temperature and in response to the  
393 bacterial pathogen *P. syringae*. The seeming incongruity between activation of multiple stress  
394 pathways and susceptibility to freezing temperatures may be due to specific mechanisms  
395 underlying freezing tolerance in plants, which include plastid membrane remodeling (Moellering  
396 et al., 2010). Indeed, low frequency, localized plastid genome changes are reported in *msh1*  
397 mutants, along with a reduction in the number of plastids per cell and dramatically altered  
398 thylakoid membrane structure in a portion of the organelle population (Xu et al., 2011). Also,  
399 loss of *MSH1* might affect the functions of its putative protein interactors, such as the PsbP  
400 family protein PPD3 (Viridi et al., 2016), which could further impact the plastid. Alternatively,  
401 *msh1* mutants may be unable to mount an appropriate response to freezing stress due to  
402 desynchronization of the circadian clock (Shao et al., 2017), which influences freezing tolerance  
403 (Maibam et al., 2013). Freezing tolerance is impaired in *cca1-11/lhy-21* double mutants, and *gi-*  
404 *3* mutants are susceptible to freezing stress due to impaired sugar metabolism (Cao et al., 2005;  
405 Dong et al., 2011). Also, CBF1 and CBF3 genes, which are positive regulators of cold  
406 acclimatization (Novillo et al., 2007), are down-regulated in *msh1* mutants (Shao et al., 2017).

407 A recent study has suggested that miR163 is a negative regulator of defense response to  
408 *P. syringae* in Arabidopsis (Chow and Ng, 2017). Interestingly, *msh1* mutants with variegation  
409 and dwarfing showed up-regulation of miR163, while *msh1* mutants with subtle mutant  
410 phenotype did not show any changes (Shao et al., 2017). The up-regulation of miR163 in *msh1*  
411 mutants with pronounced phenotype corresponds well with their susceptibility to the bacterial  
412 pathogen, while mutants with mild *msh1* phenotype show survival rates similar to wild type (Fig  
413 S1B). Therefore, one possible explanation for observed stress responses is that organellar  
414 changes and/or modulation of key regulatory genes might affect particular stress response, while  
415 the vast majority of transcriptional changes may comprise a compensatory response that does not  
416 affect the phenotypic outcome.

417 Whole-genome bisulfite sequencing of *msh1* mutants previously revealed numerous  
418 changes in DNA methylation over both genic regions and transposable elements (Viridi et al.,  
419 2015), raising the possibility of epigenetic feedback as a response to *MSH1* loss, and heritable  
420 methylation changes at stress-responsive loci (Kinoshita and Seki, 2014). Enhanced tolerance to  
421 salt stress in epi-lines developed by crossing wild type Col-0 with *msh1* mutants supports the  
422 heritability of methylation changes at stress-responsive loci. The derived epi-lines also showed  
423 tolerance to freezing stress, despite the parental *msh1* mutant showing susceptibility to freezing  
424 temperatures. It is possible that circadian regulation may resynchronize following the crossing of  
425 *msh1* mutants with wild type, which is known to influence freezing tolerance in plants (Maibam  
426 et al., 2013). In comparable soybean epi-F<sub>4</sub> lines, circadian genes *GI* and *PRR3/5/7* were up-  
427 regulated (Raju et al., 2017), suggesting that modulation of circadian regulators follows crosses  
428 with *msh1*.

429 Derived epi-lines have been shown to display higher yield stability through reduced  
430 epitype-by-environment effect in soybean multi-location field trials (Raju et al., 2017). In  
431 Arabidopsis, we likewise observed a lower yield penalty under mild heat stress in epi-lines  
432 compared to wild type (Fig 2B), implying higher buffering across environments. These  
433 observations invite more detailed investigation of the link between *msh1* derived epigenetic  
434 variation and decreased environment interaction in derived epi-lines.

435 Long-term cold stress disproportionately affects *msh1* mutants, which show an amplified  
436 CHH hypomethylation response primarily in the heterochromatic region. It is notable that  
437 epigenetic changes reported in *msh1* mutants under cold stress mainly involve non-CG  
438 methylation at TE sites, predominantly retroelements known to be affected by stress (Wessler,  
439 1996). We also see down-regulation of *CMT3* and *DMM1* in cold-stressed *msh1* mutant  
440 compared to wild type and unstressed *msh1* (Fig S5), which is implicated in heterochromatic TE  
441 derepression.

442 The *msh1* mutants showed significant differences in expression of TE superfamilies.  
443 Differentially expressed TEs belonged to Rath elements, SINEs, and Mariner superfamilies  
444 known to contain shorter TEs, on average (Lewsey et al., 2016), that are usually methylated by  
445 the DRM1/2 pathway (Stroud et al., 2014; Stroud et al., 2013). Mariner TE sequences are  
446 significantly underrepresented in exons and are often absent in GC-rich genic regions of the  
447 genome (Lockton and Gaut, 2009).

448 Transcriptome studies showed that stress was consistently the major contributor to gene  
449 expression changes in wild type and *msh1* mutants. This is expected since changes in CHG and  
450 CHH methylation in Arabidopsis are concentrated around the pericentromere, while CG changes  
451 are distributed throughout the genome, and non-CG methylation changes are unlikely to direct  
452 gene expression changes.

453 A recent study involving multiple ecotypes in Arabidopsis has shown CHH  
454 hypomethylation from lower temperatures, with much of the temperature variation in CHH  
455 methylation due to components of the RdDM pathway (Dubin et al., 2015). Reports of  
456 chromatin changes and epigenetic features of stress memory in plants and observations that some  
457 epigenetic mutants have altered stress responses support the argument that these changes may  
458 have biological roles (Probst and Mittelsten Scheid, 2015). Interestingly, the increased variation  
459 in non-CG methylome divergence in *msh1* mutants does not seem to have any significant effect  
460 on the previously described *msh1*-derived enhanced growth phenotype (Viridi et al., 2015),  
461 emphasizing the importance of *MSH1*-induced CG methylation changes in this phenomenon. CG  
462 methylation changes are more stably transmitted to progeny than non-CG changes (Saze et al.,  
463 2003). A recent study also showed that non-repetitive sequences and higher CG content  
464 predispose a region for the transgenerational stability of inherited epigenetic features (Catoni et  
465 al., 2017). Moreover, stress-induced epigenetic memory is conditionally heritable through the  
466 female germline (Wibowo et al., 2016). This excludes the possibility of inheritance of stress-  
467 induced methylation changes, particularly non-CG changes to the crossed progeny of this study  
468 since *msh1* mutants were used as the pollen donor.

469 Results from this study indicate that *msh1* methylomes are hyper-responsive to  
470 environmental stress in a manner distinct from the wild type response, and identification of the  
471 *msh1* background as a modifier of cold-induced CHH hypomethylation provides an experimental

472 system to further understand mechanisms that control temperature-responsive methylation  
473 changes and their inheritance behavior in crossed and selfed progeny. The experimental design  
474 of this study allowed discrimination of CG methylation changes rather than non-CG in *msh1*  
475 mutants as an influence on growth behavior of epi-lines following crossing with wild type.

#### 476 **ACKNOWLEDGEMENTS:**

477  
478 We thank Bridget Bickner for technical assistance with phenotypic measurements and PCR  
479 analysis, Dr Rebecca Roston for help in establishing freezing tolerance tests, and Dr. John Laurie  
480 for valuable conversations early in the study. We also acknowledge funding to S.M. from the Bill  
481 and Melinda Gates Foundation (OPP1088661).

#### 482 483 **AUTHORS CONTRIBUTIONS:**

484  
485 Conceptualization: SM and SKKR; Experiment design: SKKR and SM; Performed experiments:  
486 SKKR, with YW in biotic stress tests; Data Analysis: MRS and SKKR; Writing – Original Draft:  
487 SKKR; Writing – Review and editing: SM; All authors read and approved the final manuscript.

488

#### 489 **REFERENCES**

490 Akalin, A., Kormaksson, M., Li, S., Garrett-Bakelman, F.E., Figueroa, M.E., Melnick, A. and  
491 Mason, C.E. (2012) methylKit: a comprehensive R package for the analysis of genome-  
492 wide DNA methylation profiles. *Genome biology* **13**, R87.

493 Barnes, A.C., Benning, C. and Roston, R. (2016) Chloroplast membrane remodeling during  
494 freezing stress is accompanied by cytoplasmic acidification activating SENSITIVE TO  
495 FREEZING 2. *Plant physiology*, pp. 00286.02016.

496 Benjamini, Y. and Hochberg, Y. (1995) Controlling the false discovery rate: a practical and  
497 powerful approach to multiple testing. *Journal of the royal statistical society. Series B*  
498 *(Methodological)*, 289-300.

499 Bilichak, A. and Kovalchuk, I. (2016) Transgenerational response to stress in plants and its  
500 application for breeding. *J Exp Bot* **67**, 2081-2092.

501 Cao, S., Ye, M. and Jiang, S. (2005) Involvement of GIGANTEA gene in the regulation of the  
502 cold stress response in Arabidopsis. *Plant cell reports* **24**, 683-690.

503 Catoni, M., Griffiths, J., Becker, C., Zabet, N.R., Bayon, C., Dapp, M., Lieberman-Lazarovich,  
504 M., Weigel, D. and Paszkowski, J. (2017) DNA sequence properties that predict  
505 susceptibility to epiallelic switching. *The EMBO Journal*.

506 Chow, H.T. and Ng, D.W. (2017) Regulation of miR163 and its targets in defense against  
507 *Pseudomonas syringae* in Arabidopsis thaliana. *Scientific Reports* **7**, 46433.

- 508 de la Rosa Santamaria, R., Shao, M.R., Wang, G., Nino-Liu, D.O., Kundariya, H., Wamboldt,  
509 Y., Dweikat, I. and Mackenzie, S.A. (2014) MSH1-induced non-genetic variation  
510 provides a source of phenotypic diversity in Sorghum bicolor. *PLoS One* **9**, e108407.
- 511 Dobin, A., Davis, C.A., Schlesinger, F., Drenkow, J., Zaleski, C., Jha, S., Batut, P., Chaisson, M.  
512 and Gingeras, T.R. (2013) STAR: ultrafast universal RNA-seq aligner. *Bioinformatics*  
513 **29**.
- 514 Dong, M.A., Farré, E.M. and Thomashow, M.F. (2011) Circadian clock-associated 1 and late  
515 elongated hypocotyl regulate expression of the C-repeat binding factor (CBF) pathway in  
516 Arabidopsis. *Proceedings of the National Academy of Sciences* **108**, 7241-7246.
- 517 Downen, R.H., Pelizzola, M., Schmitz, R.J., Lister, R., Downen, J.M., Nery, J.R., Dixon, J.E. and  
518 Ecker, J.R. (2012) Widespread dynamic DNA methylation in response to biotic stress.  
519 *Proc Natl Acad Sci U S A* **109**, E2183-2191.
- 520 Dubin, M.J., Zhang, P., Meng, D., Remigereau, M.-S., Osborne, E.J., Casale, F.P., Drewe, P.,  
521 Kahles, A., Jean, G. and Vilhjálmsson, B. (2015) DNA methylation in Arabidopsis has a  
522 genetic basis and shows evidence of local adaptation. *Elife* **4**, e05255.
- 523 Franks, S.J. and Hoffmann, A.A. (2012) Genetics of climate change adaptation. *Annu Rev Genet*  
524 **46**, 185-208.
- 525 Hannah, M.A., Wiese, D., Freund, S., Fiehn, O., Heyer, A.G. and Hinch, D.K. (2006) Natural  
526 genetic variation of freezing tolerance in Arabidopsis. *Plant physiology* **142**, 98-112.
- 527 Hsu, P.Y. and Harmer, S.L. (2012) Circadian phase has profound effects on differential  
528 expression analysis. *PLoS One* **7**, e49853.
- 529 Huang, D.W., Sherman, B.T. and Lempicki, R.A. (2009) Systematic and integrative analysis of  
530 large gene lists using DAVID bioinformatics resources. *Nature protocols* **4**, 44-57.
- 531 Jin, Y., Tam, O.H., Paniagua, E. and Hammell, M. (2015) TETranscripts: a package for including  
532 transposable elements in differential expression analysis of RNA-seq datasets.  
533 *Bioinformatics* **31**.
- 534 Kim, D., Pertea, G., Trapnell, C., Pimentel, H., Kelley, R. and Salzberg, S.L. (2013) TopHat2:  
535 accurate alignment of transcriptomes in the presence of insertions, deletions and gene  
536 fusions. *Genome Biol* **14**.
- 537 King, E.O., Ward, M.K. and Raney, D.E. (1954) Two simple media for the demonstration of  
538 pyocyanin and fluorescein. *Journal of laboratory and clinical medicine* **44**, 301-307.
- 539 Kinoshita, T. and Seki, M. (2014) Epigenetic memory for stress response and adaptation in  
540 plants. *Plant Cell Physiol* **55**.
- 541 Krueger, F. and Andrews, S.R. (2011) Bismark: a flexible aligner and methylation caller for  
542 Bisulfite-Seq applications. *bioinformatics* **27**, 1571-1572.

- 543 Lewsey, M.G., Hardcastle, T.J., Melnyk, C.W., Molnar, A., Valli, A., Urich, M.A., Nery, J.R.,  
544 Baulcombe, D.C. and Ecker, J.R. (2016) Mobile small RNAs regulate genome-wide  
545 DNA methylation. *Proceedings of the National Academy of Sciences* **113**, E801-E810.
- 546 Li, J. and Chory, J. (1998) Preparation of DNA from Arabidopsis. *Arabidopsis Protocols*, 55-60.
- 547 Lockton, S. and Gaut, B.S. (2009) The contribution of transposable elements to expressed coding  
548 sequence in Arabidopsis thaliana. *Journal of Molecular Evolution* **68**, 80-89.
- 549 Love, M.I., Huber, W. and Anders, S. (2014) Moderated estimation of fold change and  
550 dispersion for RNA-seq data with DESeq2. *Genome Biol* **15**.
- 551 Maibam, P., Nawkar, G.M., Park, J.H., Sahi, V.P., Lee, S.Y. and Kang, C.H. (2013) The  
552 influence of light quality, circadian rhythm, and photoperiod on the CBF-mediated  
553 freezing tolerance. *International journal of molecular sciences* **14**, 11527-11543.
- 554 Moellering, E.R., Muthan, B. and Benning, C. (2010) Freezing tolerance in plants requires lipid  
555 remodeling at the outer chloroplast membrane. *Science* **330**, 226-228.
- 556 Novillo, F., Medina, J. and Salinas, J. (2007) Arabidopsis CBF1 and CBF3 have a different  
557 function than CBF2 in cold acclimation and define different gene classes in the CBF  
558 regulon. *Proceedings of the National Academy of Sciences* **104**, 21002-21007.
- 559 Probst, A.V. and Mittelsten Scheid, O. (2015) Stress-induced structural changes in plant  
560 chromatin. *Curr Opin Plant Biol* **27**.
- 561 Raju, S.K.K., Shao, M.-R., Sanchez, R., Xu, Y.-Z., Sandhu, A., Graef, G. and Mackenzie, S.  
562 (2017) An epigenetic breeding system in soybean for increased yield and stability.  
563 *bioRxiv*, 232819.
- 564 Sanchez, R., Yang, X., Kundariya, H., Barreras, J.R., Wamboldt, Y. and Mackenzie, S. (2018)  
565 Enhancing resolution of natural methylome reprogramming behavior in plants. *bioRxiv*,  
566 252106.
- 567 Saze, H., Scheid, O.M. and Paszkowski, J. (2003) Maintenance of CpG methylation is essential  
568 for epigenetic inheritance during plant gametogenesis. *Nature genetics* **34**, 65-69.
- 569 Sham, A., Moustafa, K., Al-Ameri, S., Al-Azzawi, A., Iratni, R. and AbuQamar, S. (2015)  
570 Identification of Arabidopsis candidate genes in response to biotic and abiotic stresses  
571 using comparative microarrays. *PLoS One* **10**.
- 572 Shao, M.-R., Kumar Kenchanmane Raju, S., Laurie, J.D., Sanchez, R. and Mackenzie, S.A.  
573 (2017) Stress-responsive pathways and small RNA changes distinguish variable  
574 developmental phenotypes caused by MSH1 loss. *BMC Plant Biology* **17**, 47.
- 575 Shedge, V., Davila, J., Arrieta-Montiel, M.P., Mohammed, S. and Mackenzie, S.A. (2010)  
576 Extensive rearrangement of the Arabidopsis mitochondrial genome elicits cellular  
577 conditions for thermotolerance. *Plant physiology* **152**, 1960-1970.

- 578 Slotkin, R.K. and Martienssen, R. (2007) Transposable elements and the epigenetic regulation of  
579 the genome. *Nat Rev Genet* **8**.
- 580 Stroud, H., Do, T., Du, J., Zhong, X., Feng, S., Johnson, L., Patel, D.J. and Jacobsen, S.E. (2014)  
581 Non-CG methylation patterns shape the epigenetic landscape in Arabidopsis. *Nature*  
582 *structural & molecular biology* **21**, 64-72.
- 583 Stroud, H., Greenberg, M.V., Feng, S., Bernatavichute, Y.V. and Jacobsen, S.E. (2013)  
584 Comprehensive analysis of silencing mutants reveals complex regulation of the  
585 Arabidopsis methylome. *Cell* **152**, 352-364.
- 586 Uller, T., English, S. and Pen, I. (2015) When is incomplete epigenetic resetting in germ cells  
587 favoured by natural selection? In: *Proc. R. Soc. B* p. 20150682. The Royal Society.
- 588 Viridi, K.S., Laurie, J.D., Xu, Y.Z., Yu, J., Shao, M.R., Sanchez, R., Kundariya, H., Wang, D.,  
589 Riethoven, J.J., Wamboldt, Y., Arrieta-Montiel, M.P., Shedge, V. and Mackenzie, S.A.  
590 (2015) Arabidopsis MSH1 mutation alters the epigenome and produces heritable changes  
591 in plant growth. *Nat Commun* **6**, 6386.
- 592 Viridi, K.S., Wamboldt, Y., Kundariya, H., Laurie, J.D., Keren, I., Kumar, K.S., Block, A.,  
593 Basset, G., Luebker, S. and Elowsky, C. (2016) MSH1 is a plant organellar DNA binding  
594 and thylakoid protein under precise spatial regulation to alter development. *Molecular*  
595 *Plant* **9**, 245-260.
- 596 Ward Jr, J.H. (1963) Hierarchical grouping to optimize an objective function. *Journal of the*  
597 *American statistical association* **58**, 236-244.
- 598 Wessler, S.R. (1996) Plant retrotransposons: turned on by stress. *Current Biology* **6**, 959-961.
- 599 Wibowo, A., Becker, C., Marconi, G., Durr, J., Price, J., Hagmann, J., Papareddy, R., Putra, H.,  
600 Kageyama, J. and Becker, J. (2016) Hyperosmotic stress memory in Arabidopsis is  
601 mediated by distinct epigenetically labile sites in the genome and is restricted in the male  
602 germline by DNA glycosylase activity. *Elife* **5**, e13546.
- 603 Xu, Y.Z., Arrieta-Montiel, M.P., Viridi, K.S., de Paula, W.B., Widhalm, J.R., Basset, G.J.,  
604 Davila, J.I., Elthon, T.E., Elowsky, C.G., Sato, S.J., Clemente, T.E. and Mackenzie, S.A.  
605 (2011) MutS HOMOLOG1 is a nucleoid protein that alters mitochondrial and plastid  
606 properties and plant response to high light. *Plant Cell* **23**, 3428-3441.
- 607 Xu, Y.Z., Santamaria Rde, L., Viridi, K.S., Arrieta-Montiel, M.P., Razvi, F., Li, S., Ren, G., Yu,  
608 B., Alexander, D., Guo, L., Feng, X., Dweikat, I.M., Clemente, T.E. and Mackenzie, S.A.  
609 (2012) The chloroplast triggers developmental reprogramming when mutS HOMOLOG1  
610 is suppressed in plants. *Plant Physiol* **159**, 710-720.
- 611 Yang, X., Kundariya, H., Xu, Y.Z., Sandhu, A., Yu, J., Hutton, S.F., Zhang, M. and Mackenzie,  
612 S.A. (2015) MutS HOMOLOG1-derived epigenetic breeding potential in tomato. *Plant*  
613 *Physiol* **168**, 222-232.



614 Yong-Villalobos, L., González-Morales, S.I., Wrobel, K., Gutiérrez-Alanis, D., Cervantes-Peréz,  
615 S.A., Hayano-Kanashiro, C., Oropeza-Aburto, A., Cruz-Ramírez, A., Martínez, O. and  
616 Herrera-Estrella, L. (2015) Methylome analysis reveals an important role for epigenetic  
617 changes in the regulation of the Arabidopsis response to phosphate starvation. *Proc Natl*  
618 *Acad Sci U S A* **112**.

619 Zilberman, D. (2017) An evolutionary case for functional gene body methylation in plants and  
620 animals. *Genome biology* **18**, 87.

## 621 **FIGURE LEGENDS**

### 622 **Figure 1. Abiotic stress tests in Arabidopsis *msh1* mutants**

623 **A)** Percent germination rate of wild type Col-0 and, *msh1* mutants #9, #12-4, and #12-29 at  
624 200mM NaCl-supplemented growth media, scored after two weeks post sowing [n=100 plants  
625 each; error bars represent standard error of means (SEM)]. **B)** Proportion of recovered (survived)  
626 plants seven days post freezing treatment at -10 °C. *sfr2-3* was used as negative control for  
627 freezing tolerance (n=130, error bars represent SEM). Significance at '\*\*\*' 0.001 '\*\*' 0.01 '\*'  
628 0.05 '.' 0.1

### 629 **Figure 2. Total yield measurements for *msh*- derived epi-lines compared to wild type Col-0**

630 **A)** Whisker plots showing differences in seed yield between wild type and *msh1* epi-lines under  
631 control (22 °C) and mild heat-stress (32 °C) growth conditions [Control (n=36), heat stress  
632 (n=18)]. **B)** Percent change in seed weight for epi-lines under control and heat stress condition  
633 compared to seed weight of wild type under control growth conditions.

### 634 **Figure 3. Methylome changes in *msh1* mutants and wild type Col-0 from long-term cold stress**

636 **A)** Principal component analysis (PCA) plots for methylation levels within 100-bp windows  
637 separated for nucleotide context; CG, CHG, and CHH (H represents A, C, or T). **B)** Graph of  
638 total DMR numbers in each comparison, showing hyper and hypomethylation in all three  
639 contexts. **(C-E)** DMR counts and hierarchical clustering of all pair-wise comparisons, for CG  
640 **(C)**, CHG **(D)**, and CHH **(E)** contexts. Red dotted lines highlight *msh1* cold response relative to  
641 wild type under cold stress.

### 642 **Figure 4. Transcriptome changes in *msh1* mutants before and after chronic cold stress**

643 **A)** PCA plot from normalized log values of gene expression from wild type and *msh1* mutants  
644 under control or cold stress. **B)** Heat map showing differential expression of transposable  
645 element (TE) super families from each corresponding comparison within cold stress experiment.

646

647 **Figure 5. Variation in rosette diameter and seed weight in *MSH1* epi-F<sub>2</sub> population**

648 A) Whisker plot showing variation in rosette diameter measured at 6 weeks after sowing (n= 18).  
649 B) Whisker plot showing variation in total seed weight measured carefully after bagging the  
650 plants with Arabisifter (Lehle Seeds, SNS-03). Epi-F<sub>2</sub> populations were developed from cold  
651 stressed (S) and unstressed *msh1* mutants with (VD) or without (N) phenotype. F<sub>2</sub> plants were  
652 selected after genotyping for *MSH1/MSH1* wild type allele. Rosette diameter and seed weight  
653 were measured from the same set of F<sub>2</sub> plants. Significance at '\*\*\*' 0.001 '\*\*' 0.01 '\*' 0.05 '.' 0.1

654 **Figure 6. Rosette diameter and total seed weight in selected epiF<sub>2:3</sub>**

655 A) Seed weight measurements from top 20% selection in each epi-F<sub>2</sub> population, including four  
656 sub-lines for wild type and WT x WT(S). Seed weight was measured in milligrams dried seeds  
657 collected from plants bagged with Arabisifter (Lehle Seeds, SNS-03). Black dotted line  
658 represents wild type average (n=9 plants each). B) Rosette diameter measured from the same  
659 plants at six weeks post sowing. Significance at '\*\*\*' 0.001 '\*\*' 0.01 '\*' 0.05 '.' 0.1

660 **Figure 7. Abiotic stress tolerance in epi-F<sub>3</sub>s derived from cold-stressed (S) and unstressed**  
661 ***msh1* mutants**

662 A) Percent germination of wild type Col-0 and epi-F<sub>3</sub> bulks; WT x *msh1*-N, WT x *msh1*-VD,  
663 WT x *msh1*-N(S), WT x *msh1*-VD(S) at 200mM NaCl-supplemented growth media. Each bar  
664 represents three replicates (n=225) and error bars show SEM. B) Percent survival of wild type  
665 and epi-F<sub>3</sub>s, after 12 hrs at -10 °C. *sfr2-3* was used as negative control. Survival was scored after  
666 one week recovery from three replicates (n=100), error bars represent SEM.

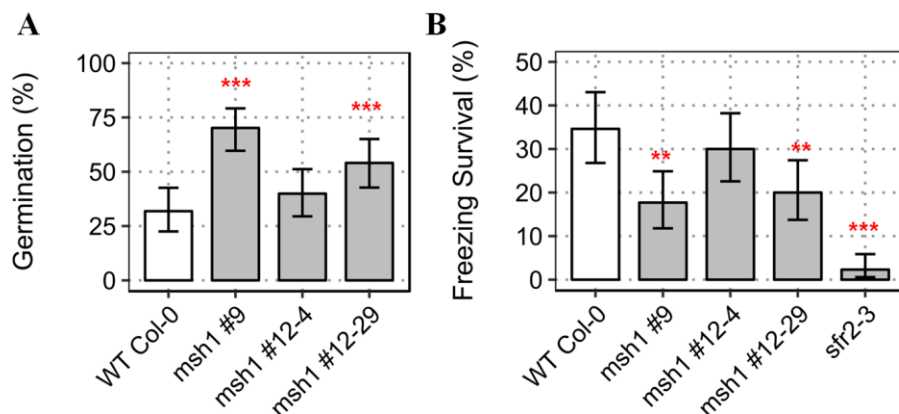

**Figure 1. Abiotic stress tests in Arabidopsis *msh1* mutants**

**A)** Percent germination rate of wild type Col-0 and, *msh1* mutants #9, #12-4, and #12-29 at 200mM NaCl-supplemented growth media, scored after two weeks post sowing [n=100 plants each; error bars represent standard error of means (SEM)]. **B)** Proportion of recovered (survived) plants seven days post freezing treatment at -10 °C. *sfr2-3* was used as negative control for freezing tolerance (n=130, error bars represent SEM). Significance at '\*\*\*' 0.001 '\*\*' 0.01 '\*' 0.05 '.' 0.1

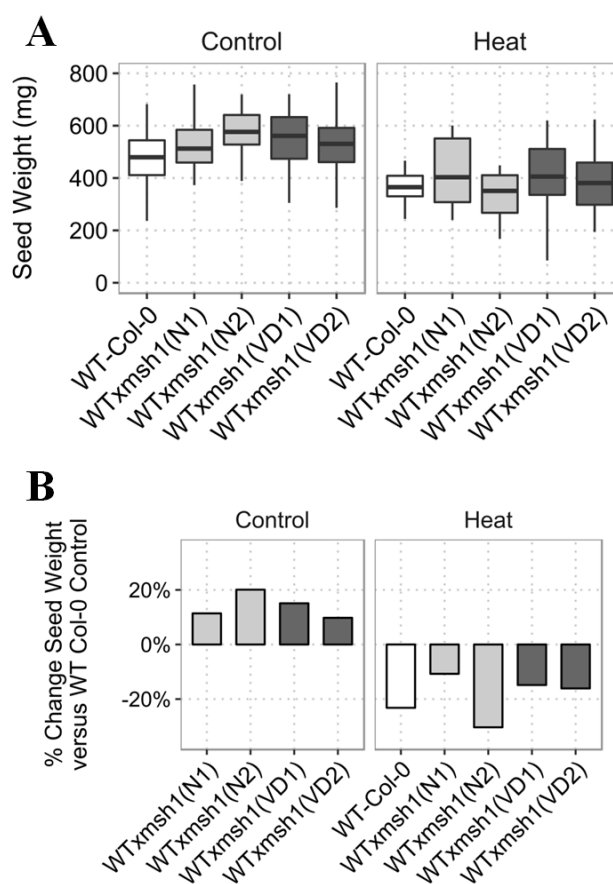

**Figure 2. Total yield measurements for *msh*- derived epi-lines compared to wild type Col-0**

**A)** Whisker plots showing differences in seed yield between wild type and *msh1* epi-lines under control (22 °C) and mild heat-stress (32 °C) growth conditions [Control (n=36), heat stress (n=18)]. **B)** Percent change in seed weight for epi-lines under control and heat stress condition compared to seed weight of wild type under control growth conditions.

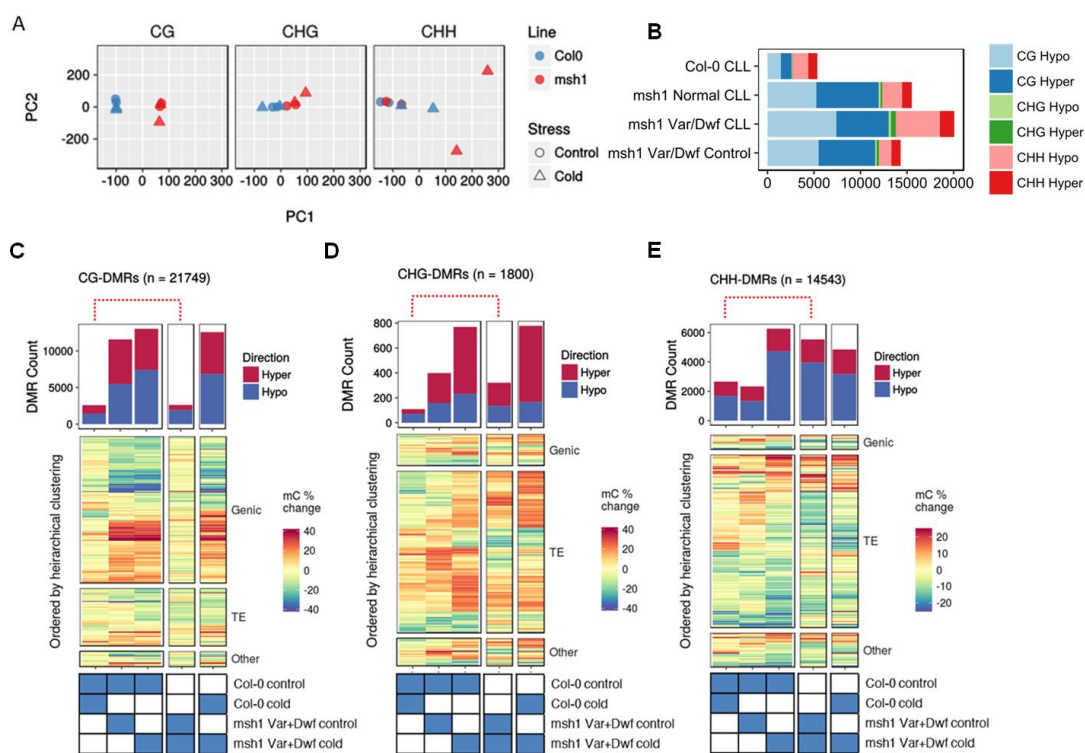

**Figure 3. Methyome changes in *msh1* mutants and wild type Col-0 from long-term cold stress**

**A)** Principal component analysis (PCA) plots for methylation levels within 100-bp windows separated for nucleotide context; CG, CHG, and CHH (H represents A, C, or T). **B)** Graph of total DMR numbers in each comparison, showing hyper and hypomethylation in all three contexts. **(C-E)** DMR counts and hierarchical clustering of all pair-wise comparisons, for CG **(C)**, CHG **(D)**, and CHH **(E)** contexts. Red dotted lines highlight *msh1* cold response relative to wild type under cold stress.

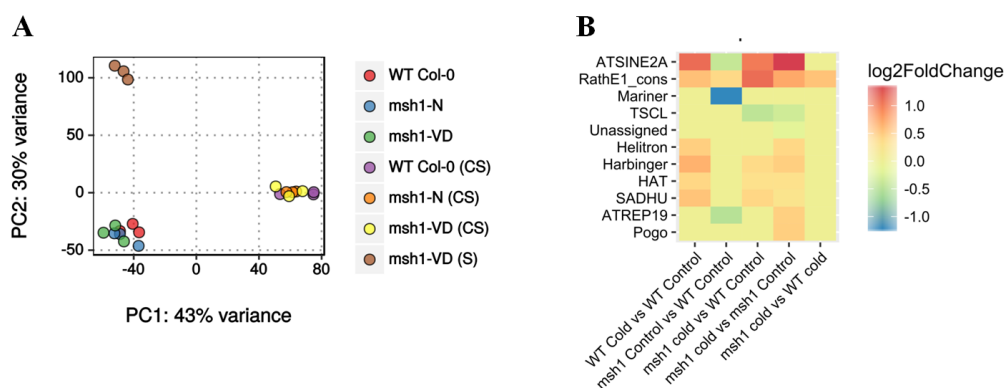

**Figure 4. Transcriptome changes in *msh1* mutants before and after chronic cold stress**

**A)** PCA plot from normalized log values of gene expression from wild type and *msh1* mutants under control or cold stress. **B)** Heat map showing differential expression of transposable element (TE) super families from each corresponding comparison within cold stress experiment.

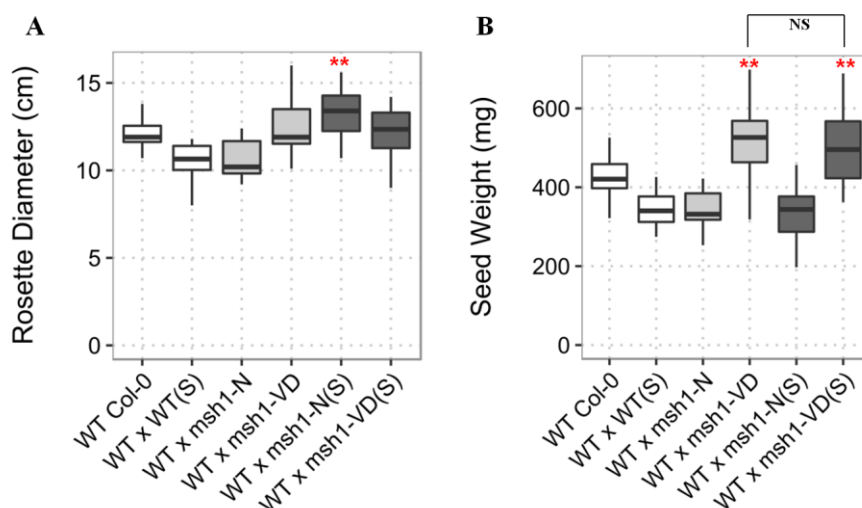

**Figure 5. Variation in rosette diameter and seed weight in *MSH1* epi-F<sub>2</sub> population**

A) Whisker plot showing variation in rosette diameter measured at 6 weeks after sowing (n= 18).

B) Whisker plot showing variation in total seed weight measured carefully after bagging the plants with Arabisifter (Lehle Seeds, SNS-03). Epi-F<sub>2</sub> populations were developed from cold stressed (S) and unstressed *msh1* mutants with (VD) or without (N) phenotype. F<sub>2</sub> plants were selected after genotyping for *MSH1/MSH1* wild type allele. Rosette diameter and seed weight were measured from the same set of F<sub>2</sub> plants. Significance at '\*\*\*' 0.001 '\*\*' 0.01 '\*' 0.05 '.' 0.1

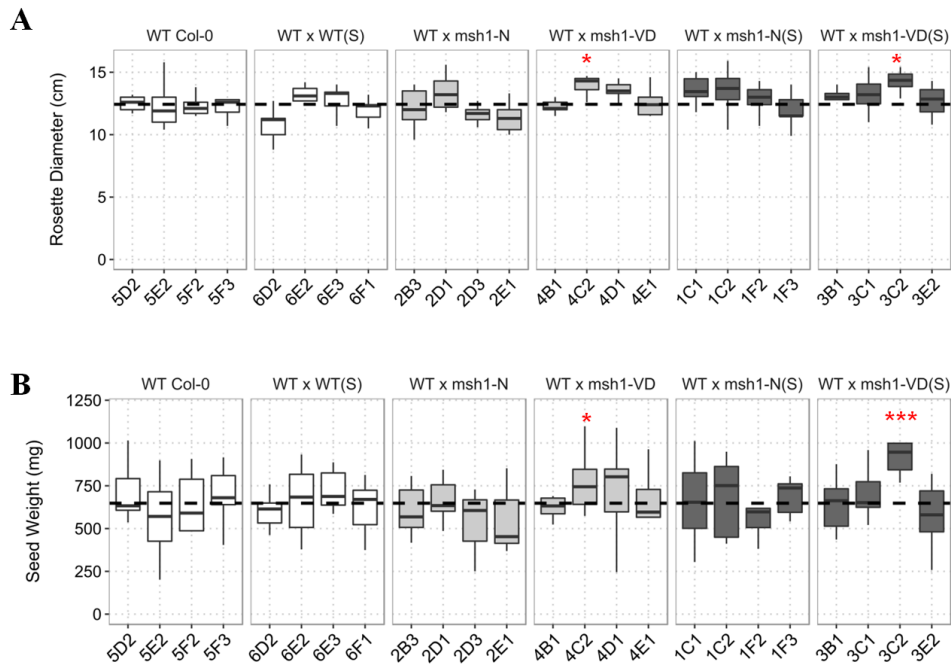

**Figure 6. Rosette diameter and total seed weight in selected epiF<sub>2:3</sub>**

**A)** Seed weight measurements from top 20% selection in each epi-F<sub>2</sub> population, including four sub-lines for wild type and WT x WT(S). Seed weight was measured in milligrams dried seeds collected from plants bagged with *Arabisifiter* (Lehle Seeds, SNS-03). Black dotted line represents wild type average (n=9 plants each). **B)** Rosette diameter measured from the same plants at six weeks post sowing. Significance at '\*\*\*' 0.001 '\*\*' 0.01 '\*' 0.05 '!' 0.1



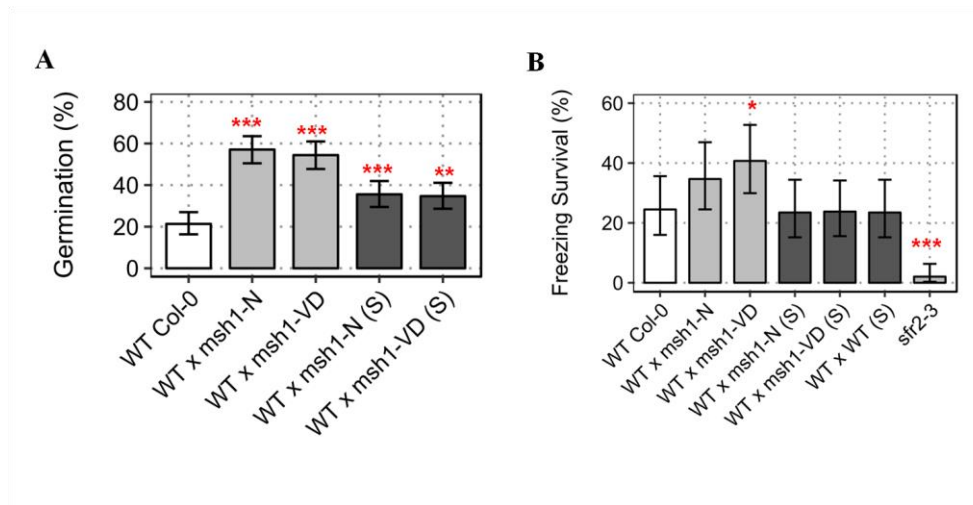

**Figure 7. Abiotic stress tolerance in epi-F<sub>3</sub>s derived from cold-stressed (S) and unstressed *msh1* mutants**

**A)** Percent germination of wild type Col-0 and epi-F<sub>3</sub> bulks; WT x *msh1*-N, WT x *msh1*-VD, WT x *msh1*-N(S), WT x *msh1*-VD(S) at 200mM NaCl-supplemented growth media. Each bar represents three replicates (n=225) and error bars show SEM. **B)** Percent survival of wild type and epi-F<sub>3</sub>s, after 12 hrs at -10 °C. *sfr2-3* was used as negative control. Survival was scored after one week recovery from three replicates (n=100), error bars represent SEM. Significance at '\*\*\*' 0.001 '\*\*' 0.01 '\*' 0.05 '.' 0.1

**TABLE:**

**Table 1: Number of DMRs in all three cytosine contexts across multiple comparisons**

| Comparison                    | Direction | CG   | CHG | CHH  |
|-------------------------------|-----------|------|-----|------|
| <i>msh1</i> vs WT             | Hyper     | 6085 | 240 | 996  |
|                               | Hypo      | 5494 | 159 | 1336 |
| <i>msh1(S)</i> vs <i>msh1</i> | Hyper     | 700  | 186 | 1574 |
|                               | Hypo      | 1926 | 135 | 3965 |
| WT(S) vs WT                   | Hyper     | 1154 | 37  | 977  |
|                               | Hypo      | 1438 | 72  | 1681 |
| <i>msh1(S)</i> vs WT          | Hyper     | 5626 | 538 | 1548 |
|                               | Hypo      | 7400 | 232 | 4723 |
| <i>msh1(S)</i> vs WT(S)       | Hyper     | 5707 | 611 | 1675 |
|                               | Hypo      | 6829 | 167 | 3176 |

**SUPPLEMENTAL DATASETS**

**Dataset S1:** Genes differentially expressed in *msh1* mutants that are known to respond to salt stress from Sham, et al. (2015).

**Dataset S2:** Genes differentially expressed in *msh1* mutants that are known to respond to cold and freezing temperatures from Hannah, et al. (2014).

**Dataset S3:** Hierarchical clustering of CHG-DMRs and CHH-DMRs between stressed *msh1* and wild type, with enrichment analysis for TE super families in each cluster.

**Dataset S4:** Enriched GO terms from differentially expressed genes in wild type and *msh1* mutants under different comparisons.

## SUPPLEMENTAL FIGURES

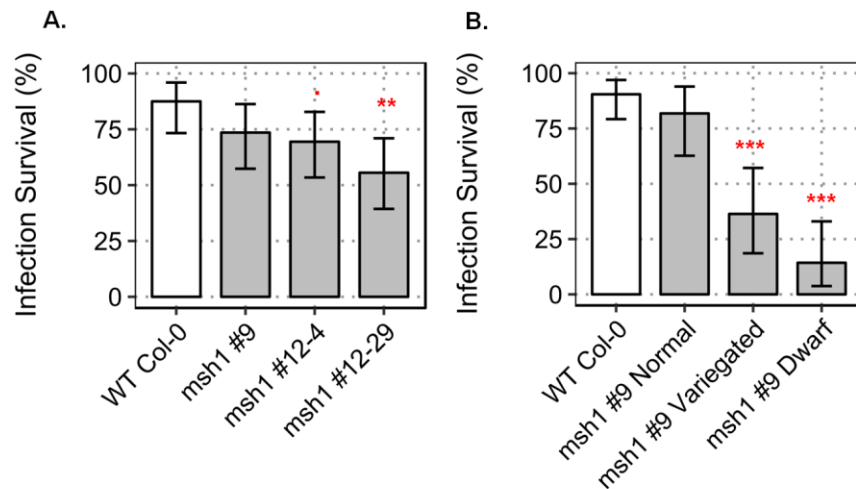

**Figure S1: Survival rate of *A. thaliana* *msh1* mutants after *P. syringae* infection**

A) Percent survival in *msh1* mutants and wild type after *P. syringae* pv. *tomato* DC3000 infection (n= 32 plants each). B) Survival rate of *msh1* mutants, with varying phenotype severity, and wild type after *P. syringae* pv. *tomato* DC3000 infection [for wild type n=42, *msh1* #9 n= 65 (normal phenotype =22, variegated=22, and dwarf = 21)]. Significance at '\*\*\*' 0.001 '\*\*' 0.01 '\*' 0.05 '.' 0.1

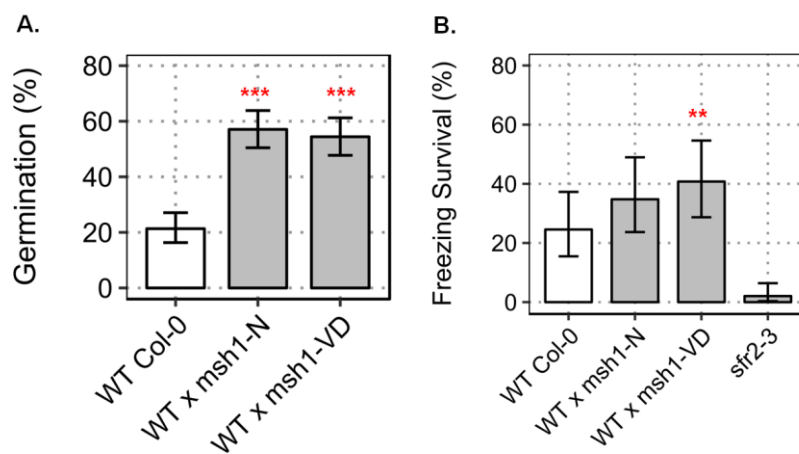

**Figure S2: Abiotic stress tolerance in *msh1*-derived epi-lines**

A) Percent germination of wild type Col-0, epi-F<sub>3</sub> bulk WT x *msh1*-N and WT x *msh1*-VD at 200mM NaCl-supplemented growth media. Each bar represents three replicates (n=225), and error bars show SEM. B) Percent survival of wild type and two epi-lines after 12 hrs at -10 °C. *sfr2-3* was used as negative control. Survival was scored after one week recovery from three replicates (n=100), error bars represent SEM. Significance at \*\*\*' 0.001 '\*\*' 0.01 '\*' 0.05 '! 0.1

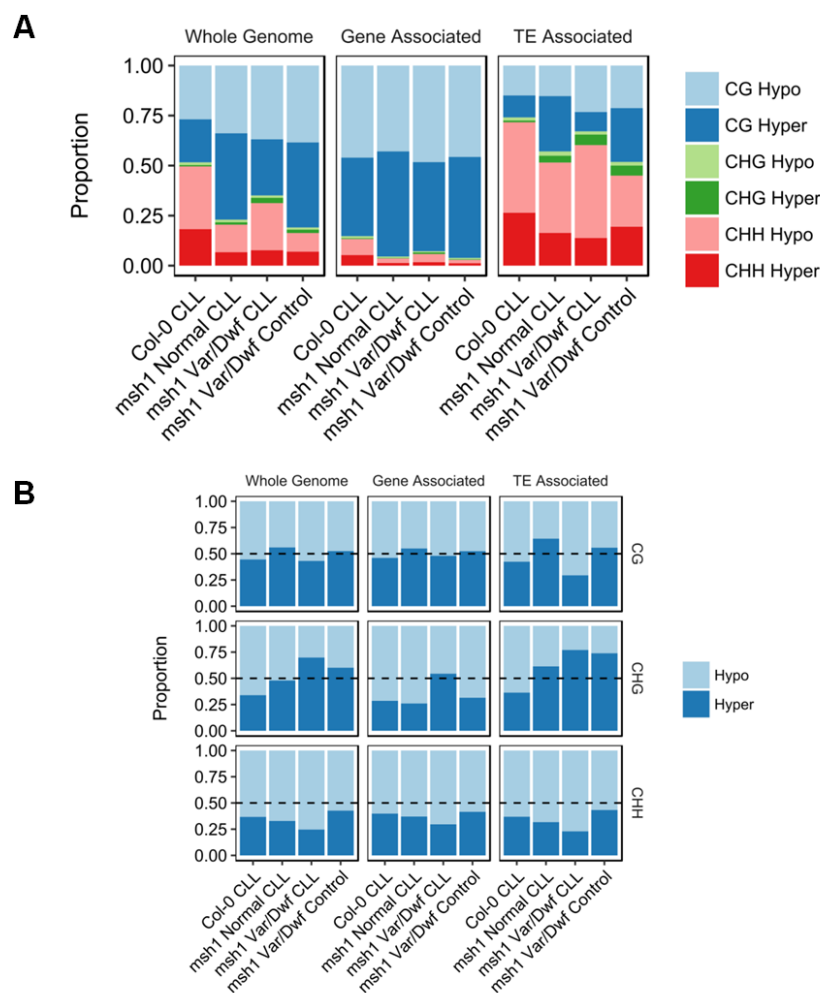

**Figure S3: DMR distribution over genes and transposable elements in wild type and *msh1* mutants**

**A)** Proportions of DMRs in each context and their genomic distribution over gene-associated and TE-associated regions of the genome. **B)** Proportion of DMRs in each cytosine context, separated based on hyper or hypomethylation. DMRs are calculated by comparing each genotype [cold-stressed wild type (Col-0 CLL) and *msh1* mutants with (CLL) or without cold stress] to control wild type Col-0.

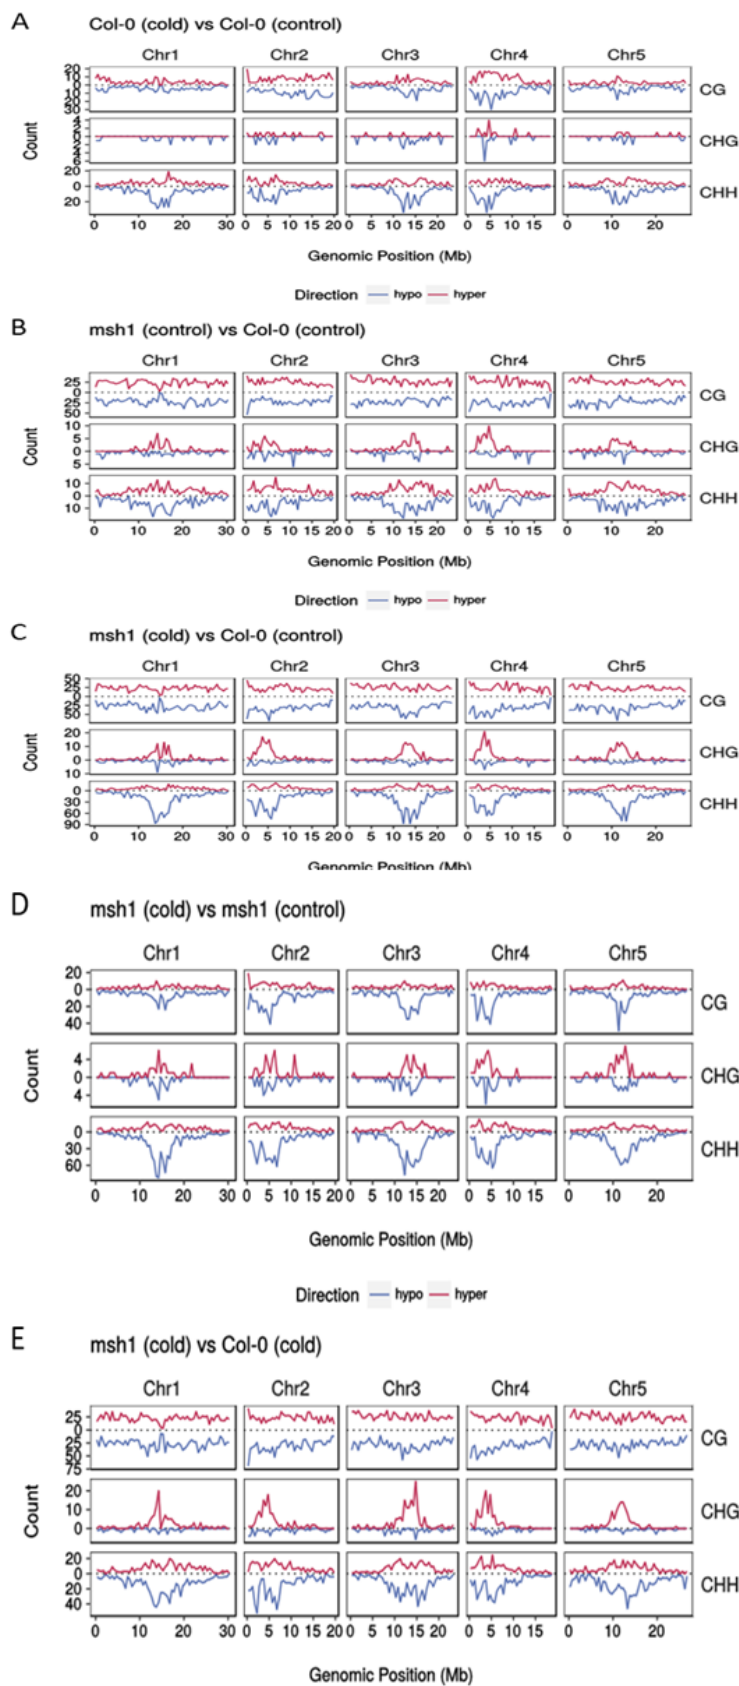

### Figure S4: Genomic distribution of DMRs from cold treatment in *msh1* mutants

The *msh1* mutants used are variegated and dwarfed plants. (A) Col-0 (cold) vs Col-0 (control). (B) *msh1* (control) vs Col-0 (control). (C) *msh1* (cold) vs Col-0 (control). (D) *msh1* (cold) vs *msh1* (control). (E) *msh1* (cold) vs Col-0 (control). Note the y-axes are independently scaled by comparison and context.

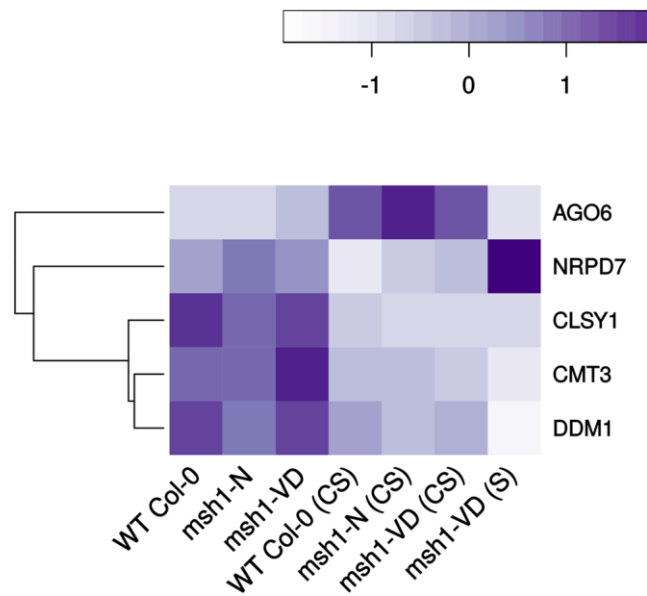

### Figure S5: Heatmap showing differential expression of methylation machinery genes in *msh1* mutants under chronic cold stress

Genes differentially expressed (normalized fold change) in at least one comparison between wild type and *msh1* mutants were considered for the heatmap, from a list of genes involved in methylation machinery (Matzke, et al. 2009).

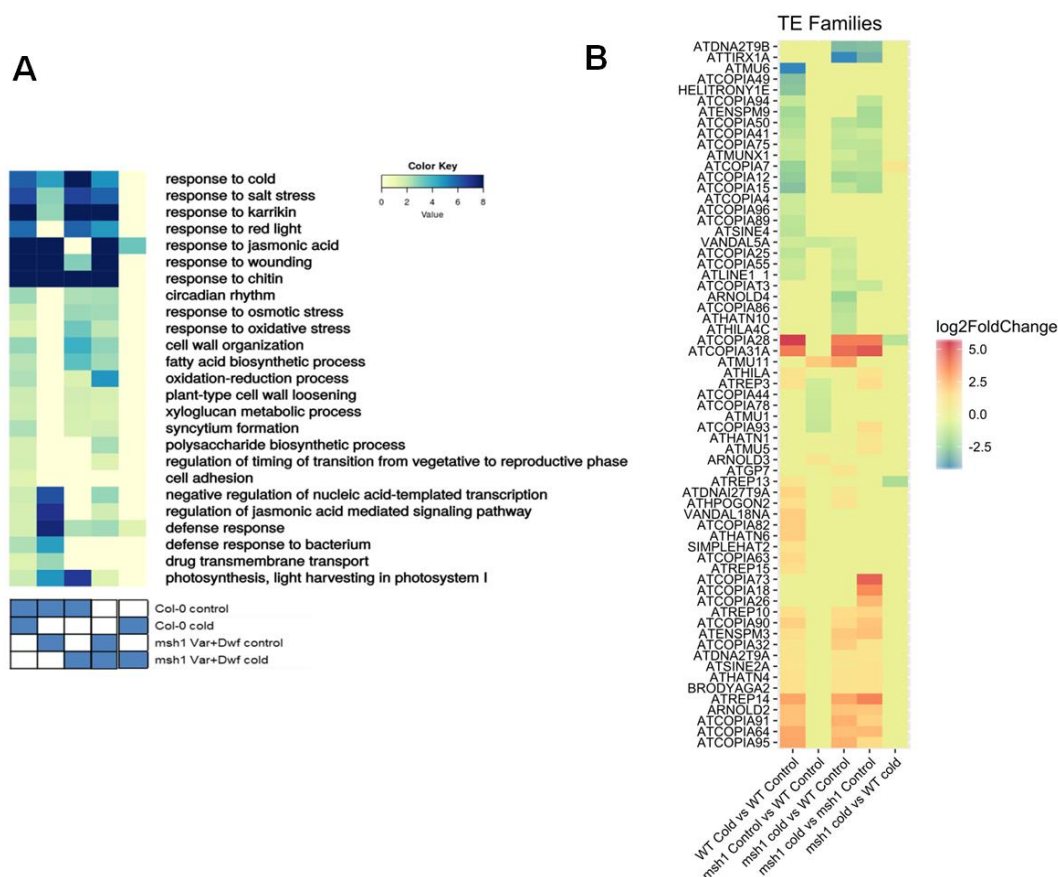

**Figure S6: Heat maps showing differential expression of genes and transposable elements**

**A)** Heat map showing enriched GO terms for differentially expressed genes in comparisons between wild type and *msh1* mutants with or without stress. **B)** Heat map showing differential expression of transposable elements at the family level.



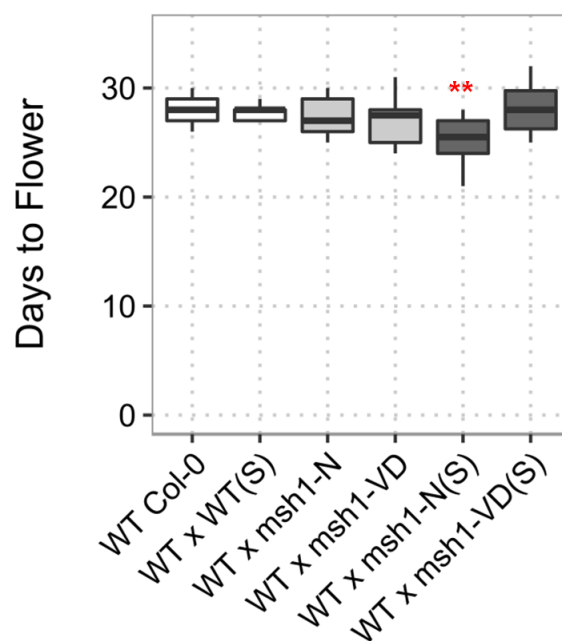

**Figure S7. Variation in days to flowering in epi-F<sub>2</sub>s derived from cold-stressed (S) and unstressed *msh1* mutants**

Days to flowering was measured as number of days from germination to the first open flower. Eighteen plants were sampled for each F<sub>2</sub> population and wild type. Plants were grown in 12/12 hr light/dark cycle at 22 °C. Significance at '\*\*\*\*' 0.001 '\*\*' 0.01 '\*' 0.05 '!' 0.1.
